# Supplementary material
Source: PubMed Central journal article supplement (PMC5710570)
Supplement: jamainternmed-177-1297-s001.pdf [file jamainternmed-177-1297-s001.pdf]

## Supplementary Online Content

Rahman MM, Karan A, Rahman MS, et al. Progress toward universal health coverage: a comparative analysis in 5 South Asian countries. *JAMA Intern Med*. Published online July 31, 2017. doi:10.1001/jamainternmed.2017.3133

**eTable 1.** Description of the Included Surveys by Country

**eTable 2.** List of Intervention Coverage and Financial Risk Indicators and Data Sources

**eTable 3.** Slope Index of Inequality by Intervention in Five South Asian Countries

**eTable 4.** Slope Index of Inequality in Catastrophic Health Payments in Five South Asian Countries

**eMethods.** Measurement of Indices and Indicators

This supplementary material has been provided by the authors to give readers additional information about their work.

**eTable 1. Description of the Included Surveys by Country**

| Country     | Survey Year | Survey Name | Survey Design                  | Sampled Households | Response Rate |
|-------------|-------------|-------------|--------------------------------|--------------------|---------------|
| Afghanistan | 2015        | ADHS        | Stratified, cluster sample     | 24,941             | 98%           |
| Afghanistan | 2014        | ALCS        | Stratified, cluster sample     | 20,786             | 96%           |
| Bangladesh  | 2014        | BDHS        | Stratified, cluster sample     | 17,565             | 99%           |
| Bangladesh  | 2010        | BHIES       | Stratified, cluster sample     | 12,240             | 100%          |
| India       | 2014        | IDLHS       | Stratified, multi-stage sample | 65,932             | 100%          |
| India       | 2012        | INSSO       | Stratified, cluster sample     | 101,651            | 100%          |
| Nepal       | 2015        | NAHS        | Stratified, cluster sample     | 4,320              | NA            |
| Nepal       | 2014        | NMICS       | Stratified, cluster sample     | 12,598             | 99%           |
| Pakistan    | 2014        | PSLSM       | Stratified, cluster sample     | 17,989             | 100%          |
| Pakistan    | 2014        | PMICS       | Stratified, cluster sample     | 57,351             | 96%           |

Abbreviations: ALCS, Afghanistan Living Condition Survey; ADHS, Afghanistan Demographic and Health Survey; BDHS, Bangladesh Demographic and Health Survey; BHIES, Bangladesh Household Income Expenditure Survey; INSSO, Indian National Sample Survey Organization, 68th round; IDLHS, Indian District Level Household Survey; NAHS, Nepal Annual Health Survey; NMICS, Nepal Multiple Indicator Cluster Survey; PSLSM, Pakistan Social and Living Standards Measurement Survey; PMICS, Pakistan Multiple Indicator Cluster Survey.

**eTable 2. List of Intervention Coverage and Financial Risk Indicators and Data Sources**

| Indicator                       | Definition <sup>1</sup>                                                                 | Country Specific Data Sources                             |
|---------------------------------|-----------------------------------------------------------------------------------------|-----------------------------------------------------------|
| <b>Promotion and Prevention</b> |                                                                                         |                                                           |
| Improved water                  | The proportion of households whose main source of drinking water is an improved source. | ADHS 2015, BDHS 2014, IDLHS 2014, NMICS 2014, PMICS 2014, |
| Adequate sanitation             | The proportion of households with improved toilet facilities.                           | ADHS 2015, BDHS 2014, IDLHS 2014, NMICS 2014, PMICS 2014  |

|                    |                                                                                                                                                                                  |                                                          |
|--------------------|----------------------------------------------------------------------------------------------------------------------------------------------------------------------------------|----------------------------------------------------------|
| FP needs satisfied | The proportion of currently married women aged 15-49 who do not want any more children or want to wait two or more years before having another child and are using contraception | ADHS 2015, BDHS 2014, IDLHS 2014, NMICS 2014, PMICS 2014 |
|--------------------|----------------------------------------------------------------------------------------------------------------------------------------------------------------------------------|----------------------------------------------------------|

|                                 |                                                                                                                                               |                                                                 |
|---------------------------------|-----------------------------------------------------------------------------------------------------------------------------------------------|-----------------------------------------------------------------|
| <p>At least one ANC visit</p>   | <p>The proportion of women aged 15-49 years who received at least one visit from a skilled health provider during their last pregnancy.</p>   | <p>ADHS 2015, BDHS 2014, IDLHS 2014, NMICS 2014, PMICS 2014</p> |
| <p>At least four ANC visits</p> | <p>The proportion of women aged 15-49 years who received at least four visits from a skilled health provider during their last pregnancy.</p> | <p>ADHS 2015, BDHS 2014, IDLHS 2014, NMICS 2014, PMICS 2014</p> |

|                      |                                                                                                                      |                                                          |
|----------------------|----------------------------------------------------------------------------------------------------------------------|----------------------------------------------------------|
| DPT3 immunization    | The proportion of children aged 12-23 months who received three doses of diphtheria, pertussis, and tetanus vaccine. | ADHS 2015, BDHS 2014, IDLHS 2014, NMICS 2014, PMICS 2014 |
| Measles immunization | The proportion of children aged 12-23 months currently vaccinated against measles.                                   | ADHS 2015, BDHS 2014, IDLHS 2014, NMICS 2014, PMICS 2014 |
| BCG immunization     | The proportion of children aged 12-23 months who received one dose of BCG vaccine.                                   | ADHS 2015, BDHS 2014, IDLHS 2014, NMICS 2014, PMICS 2014 |

|                         |                                                                                                                   |                                                          |
|-------------------------|-------------------------------------------------------------------------------------------------------------------|----------------------------------------------------------|
| Polio3 immunization     | The proportion of children aged 12-23 months who received three doses of polio vaccine.                           | ADHS 2015, BDHS 2014, IDLHS 2014, NMICS 2014, PMICS 2014 |
| Exclusive breastfeeding | The proportion of youngest children under six months of age living with the mother who are exclusively breastfed. | ADHS 2015, BDHS 2014, IDLHS 2014, NMICS 2014, PMICS 2014 |

|                                    |                                                                                                                                                   |                                                                 |
|------------------------------------|---------------------------------------------------------------------------------------------------------------------------------------------------|-----------------------------------------------------------------|
| <p>Care seeking for pneumonia</p>  | <p>The proportion of children under 5 with suspected pneumonia who sought care from an appropriate health provider in the previous two weeks.</p> | <p>ADHS 2015, BDHS 2014, IDLHS 2014, NMICS 2014, PMICS 2014</p> |
| <p><b>Treatment Indicators</b></p> |                                                                                                                                                   |                                                                 |
| <p>Skilled birth attendance</p>    | <p>The proportion of mothers who had their delivery assisted by a skilled health professional.</p>                                                | <p>ADHS 2015, BDHS 2014, IDLHS 2014, NMICS 2014, PMICS2014</p>  |



|                      |                                                                                                                                         |                                                          |
|----------------------|-----------------------------------------------------------------------------------------------------------------------------------------|----------------------------------------------------------|
| Intentional delivery | The proportion of women that had their birth taking place in health facility                                                            | ADHS 2015, BDHS 2014, IDLHS 2014, NMICS 2014, PMICS 2014 |
| ARI treatment        | The proportion of under five children who had presumed pneumonia (last episode) in the previous two weeks were treated with antibiotics | ADHS 2015, BDHS 2014, IDLHS 2014, NMICS 2014, PMICS 2014 |

|                                 |                                                                                                                                                                                                                                       |                                                                 |
|---------------------------------|---------------------------------------------------------------------------------------------------------------------------------------------------------------------------------------------------------------------------------------|-----------------------------------------------------------------|
| <p>Oral rehydration therapy</p> | <p>The proportion of under five children with diarrhea in the previous two weeks who received oral rehydration therapy (packets of oral rehydration salts, recommended home solution, or increased fluids) and continued feeding.</p> | <p>ADHS 2015, BDHS 2014, IDLHS 2014, NMICS 2014, PMICS 2014</p> |
|---------------------------------|---------------------------------------------------------------------------------------------------------------------------------------------------------------------------------------------------------------------------------------|-----------------------------------------------------------------|

|                        |                                                                                                                            |                       |
|------------------------|----------------------------------------------------------------------------------------------------------------------------|-----------------------|
| Hypertension treatment | The proportion of persons with hypertension who are received antihypertensive medications to control their blood pressure. | BDHS 2011, IDLHS 2014 |
| Diabetes treatment     | The proportion diabetic patients received medications to control their diabetes.                                           | BDHS 2011, IDLHS 2014 |

| <b>Financial Risk Protection</b> |                                                                                                      |                                                          |
|----------------------------------|------------------------------------------------------------------------------------------------------|----------------------------------------------------------|
| Catastrophic payment             | The percent of households in a population who face catastrophic health expenditure                   | ALCS 2014, BHIES 2010, INSSO 2012, NAHS 2014, PSLSM 2014 |
| Impoverishment                   | The percent of households in a population who fell into poverty due to out-of-pocket health payments | ALCS 2014, BHIES 2010, INSSO 2012, NAHS 2014, PSLSM 2014 |

Abbreviations: ALCS, Afghanistan Living Condition Survey; ADHS, Afghanistan Demographic and Health Survey; BDHS, Bangladesh Demographic and Health Survey; BHIES, Bangladesh Household Income Expenditure Survey; INSSO, Indian National Sample Survey Organization (68th round); IDLHS; Indian District Level Household Survey (71<sup>th</sup> round); NAHS, Nepal Annual Health Survey; NMICS, Nepal Multiple Indicator Cluster Survey; PSLSM, Pakistan Social and Living Standards Measurement Survey; PMICS, Pakistan Multiple Indicator Cluster Survey.

<sup>1</sup>Indicators are selected according to WHO proposed guideline (WHO, 2015).

**eTable 3. Slope Index of Inequality by Intervention in Five South Asian Countries**

| Indicators                   | Slope index of inequalities (95% confidence interval) |                     |                          |                     |                     |
|------------------------------|-------------------------------------------------------|---------------------|--------------------------|---------------------|---------------------|
|                              | Afghanistan                                           | Bangladesh          | India                    | Nepal               | Pakistan            |
| <b>Prevention indicators</b> |                                                       |                     |                          |                     |                     |
| Improved water               | 62.9<br>(56.4-69.4)                                   | 6.5<br>(0.2-12.7)   | 0.22<br>(-0.6-1.05)      | 19.2<br>(13.7-24.7) | -5.5 (-8.1 to -2.9) |
| Adequate sanitation          | 72.2<br>(67.1-77.4)                                   | 64.6<br>(59.1-70.1) | 71.4<br>(69.4-73.3)      | 35.8<br>(28.9-42.8) | 83.8<br>(82.6-85.0) |
| FP needs satisfied           | 30.6<br>(20.6-40.5)                                   | 0.5<br>(-0.4-5.1)   | 22.2<br>(20.1-24.2)      | 5.4<br>(2.1-8.7)    | 27.7<br>(21.8-33.6) |
| At least one ANC visit       | 30.0<br>(23.7-36.3)                                   | 60.1<br>(55.3-64.9) | 5.07<br>(2.07-8.07)      | 59.5<br>(53.0-66.0) | 46.3<br>(43.3-49.3) |
| At least four ANC visits     | 27.9<br>(22.5-33.3)                                   | 52.3<br>(46.6-58.0) | 15.2<br>(10.3-20.0)<br>1 | 64.0<br>(57.4-70.7) | 74.6<br>(72.7-76.5) |
| DPT3 immunization            | 23.5<br>(16.5-30.6)                                   | 12.6<br>(8.2-27.1)  | 21.3<br>(19.8-22.8)      | 8.0<br>(-0.1-16.2)  | 41.6<br>(34.9-48.4) |
| Measles immunization         | 10.3<br>(3.7-16.8)                                    | 24.1<br>(15.3-32.8) | 15.4<br>(14.2-16.6)      | 7.8<br>(0.6-15.0)   | 37.3<br>(31.6-43.1) |
| BCG immunization             | 24.5<br>(19.1-29.8)                                   | 3.8 (0.9-6.7)       | 15.9<br>(14.6-17.2)      | 2.5<br>(-2.8-7.7)   | 23.3<br>(19.0-27.7) |
| Polio3 immunization          | 11.1<br>(5.3-16.9)                                    | 15.6<br>(6.5-24.7)  | 13.2<br>(12.1-14.2)      | 5.7<br>(-1.4-12.8)  | 21.1<br>(17.9-24.4) |

|                             |                         |                        |                     |                      |                        |
|-----------------------------|-------------------------|------------------------|---------------------|----------------------|------------------------|
| Care seeking for pneumonia  | 17.2<br>(2.6-31.8)      | 12.0 (-14.2<br>-38.3)  | 5.7<br>(4.3-7.2)    | 24.2<br>(1.2-47.1)   | 22.7<br>(15.4-30.0)    |
| Exclusive breastfeeding     | 3.1 (-0.8 -<br>14.2)    | 1.8<br>(-23.6-27.2)    | 0.7<br>(-0.4-1.7)   | 2.2 (-3.0<br>to34.4) | 0.9 (-2.0 to<br>3.8)   |
| <b>Treatment indicators</b> |                         |                        |                     |                      |                        |
| ARI treatment               | 7.5<br>(-7.8-22.7)      | -3.8 (-6.5 to<br>-1.1) | 5.6<br>(4.1-7.1)    | 32.2<br>(15.9-48.6)  | 4.27 (-4.9 to<br>13.5) |
| Oral rehydration therapy    | -2.4<br>(-11.4-6.5)     | -10.6<br>(-34.9-13.6)  | 6.6<br>(4.5-8.8)    | 7.5<br>(-8.6-23.5)   | 10.7<br>(5.6-15.7)     |
| Skilled birth attendance    | 65.7<br>(61.4-69.9<br>) | 41.1<br>(36.8-45.5)    | 50.9<br>(47.5-54.2) | 69.5<br>(63.6-75.5)  | 65.5<br>(63.3-67.8)    |
| Institutional delivery      | 66.0<br>(61.9-70.1<br>) | 61.3<br>(55.9-66.7)    | 20.8<br>(16.1-25.4) | 64.9<br>(58.0-71.8)  | 65.3<br>(63.0-67.7)    |
| Hypertension treatment      | NA                      | 31.3<br>(22.7-39.9)    | 16.6<br>(4.4-18.8)  | NA                   | NA                     |
| Diabetes treatment          | NA                      | 58.5<br>(47.4-69.6)    | 16.8<br>(14.5-19.1) | NA                   | NA                     |

|                            |                     |                     |                          |                     |                     |
|----------------------------|---------------------|---------------------|--------------------------|---------------------|---------------------|
| <b>Composite indices</b>   |                     |                     |                          |                     |                     |
| Composite coverage index   | 28.6<br>(22.0-35.3) | 21.5<br>(14.8-28.2) | 19.2<br>(17.1-21.4)      | 26.5<br>(20.8-32.2) | 35.3<br>(32.2-38.3) |
| Composite prevention index | 31.4<br>(19.2-43.6) | 25.6<br>(7.3-43.8)  | 18.1<br>(2.8-33.5)       | 26.5<br>(11.5-41.5) | 37.0<br>(21.4-52.6) |
| Composite treatment index  | 38.6<br>(16.0-61.1) | 35.9<br>(8.7-63.2)  | 22.9<br>(-11.2-57.0<br>) | 49.4<br>(29.0-69.8) | 39.5<br>(13.9-65.2) |

Abbreviations: ANC, Antenatal Care; ARI, Acute Respiratory Infection; DPT3, Three Doses of DPT Vaccine; Polio3, Three Doses of Polio Vaccine; FP, Family Planning; NA, Not Applicable

<sup>1</sup>At least three antenatal care visits

**eTable 4. Slope Index of Inequality in Catastrophic Health Payments in Five South Asian Countries**

| Country and year      | Inequality in catastrophic payments (%) <sup>1</sup> |                     |                     |                     |                     | SII (Q5:Q1)         |
|-----------------------|------------------------------------------------------|---------------------|---------------------|---------------------|---------------------|---------------------|
|                       | Q1<br>(Poorest)                                      | Q2                  | Q3                  | Q4                  | Q5<br>(Richest)     |                     |
| Afghanistan<br>(2014) | 13.4<br>(12.0–14.9)                                  | 16.2<br>(14.8-17.6) | 14.9<br>(13.6-16.3) | 14.5<br>(14.3-15.8) | 17.1<br>(15.7–18.6) | 3.0 (0.5-5.5)       |
| Bangladesh<br>(2010)  | 10.9<br>(9.5–12.5)                                   | 11.3<br>(10.0-12.8) | 15.6<br>(14.0-17.3) | 19.6<br>(17.8-21.6) | 22.0<br>(19.5–24.7) | 14.9<br>(11.3-18.5) |
| India (2012)          | 13.3<br>(12.9-13.8)                                  | 15.8<br>(15.3-16.3) | 18.9<br>(18.4-19.5) | 22.0<br>(21.4-22.6) | 24.1<br>(23.5-24.7) | 13.5<br>(11.9-15.1) |
| Nepal (2015)          | 11.8<br>(11.8–11.9)                                  | 10.2<br>(10.1-10.2) | 10.5<br>(10.5-10.6) | 14.8<br>(14.7-14.9) | 17.1<br>(17.0–17.1) | 10.4<br>(6.6-14.1)  |



|          |           |           |           |           |           |            |
|----------|-----------|-----------|-----------|-----------|-----------|------------|
| Pakistan | 4.9       | 3.9       | 4.0       | 4.6       | 4.7       | 0.2        |
| (2014)   | (4.0–6.0) | (3.1-4.8) | (3.3-4.9) | (3.8-5.5) | (3.9–5.7) | (-1.3-1.7) |
|          | )         | )         | )         |           |           |            |

Abbreviation: SII, Slope Index Inequality.

<sup>1</sup>Catastrophic payments at 10% threshold of total consumption (Q1 is the poorest wealth quintile and Q5 is the richest wealth quintile).

## **eMethods. Measurement of Indices and Indicators**

### **Composite Prevention and Treatment indices**

A composite prevention index and a composite treatment index were estimated as the mean of prevention and treatment indicators respectively to trace the progress of overall prevention and treatment coverage. To estimate the composite prevention index, we included 11 prevention indicators: at least one antenatal care visit from a skilled health professional, at least four antenatal care visits from a skilled health professional, exclusive breastfeeding, family planning demand satisfaction, improved water, adequate sanitation, BCG, measles, DPT3, Polio3 immunizations and care seeking for pneumonia. The composite treatment index was developed based on four treatment indicators including skilled birth attendance, institutional delivery, ARI treatment and oral rehydration therapy. Both indices were developed based on random-effects meta-analysis.

### **Financial Hardship**

With regard to tracking levels of financial coverage, the universal health coverage framework is somewhat simpler, proposing the use of two indicators: the incidence of impoverishment resulting from OOP health payments, and the incidence of financial catastrophe from the same cause.

Catastrophic health expenditure was estimated based on household total consumption.

Healthcare payment is defined as catastrophic if it exceeds 10% of total household consumption. A non-poor household is considered as impoverished by medical expenses when it drops below the poverty line after paying for health services. A household's health expenditure was treated as impoverishing when its total per capita consumption

spending fell below the poverty line after paying for health care. We estimated the poverty line based on subsistence food expenditure as proposed by World Health Organization.<sup>2,3</sup> The poverty line was determined based on the average food consumption at the 45<sup>th</sup> and 55<sup>th</sup> percentiles of the total household expenditure of the respective countries. The details of the procedure for estimating the poverty line are as follows:

**Step 1:** Food expenditure share ( $food_{exp_h}$ ) for each household is estimated by dividing the household's food expenditure by its total household consumption expenditure. Symbolically,

$$food_{exp_h} = \frac{food_h}{exp_h}$$

Where  $food_h$  is the household food consumption expenditure; and  $exp_h$  is the household consumption expenditure.

**Step 2:** Equivalent household size ( $eqsize_h$ ) for each household is estimated as

$$eqsize_h = hsize_h^\beta$$

Where,  $hsize_h$  represents the household size. Xu and her colleagues estimated the value of the power parameter  $\beta = 0.56$  based on household survey data from 59 countries.<sup>2,3</sup> This equivalent scale is used, rather than actual household size, because in low-and middle-income countries household consumption expenditure increases with increases in household size but that increase is less than proportionate to the increase in household size.<sup>3</sup> Many studies to date have found consistent results by applying this estimated parameter value.<sup>4-6</sup>

**Step 3:** Equivalent food expenditure ( $eqfood_h$ ) is calculated by dividing food

consumption expenditure by the equivalent household size for each household:

$$eqfood_h = \frac{food_h}{eqsize_h}$$

**Step 4:** The poverty line or equivalent per capita subsistence expenditure level (pl) is calculated from average food consumption expenditure in the 45<sup>th</sup> to 55<sup>th</sup> percentile range.

$$pl = \frac{1}{N_{i_{45-55}}} \sum_{j=i_{45}}^{i_{55}} (eqfood_h)$$

Where,

$i_{45}$  is the household in the 45<sup>th</sup> percentile of food consumption expenditure;

$i_{55}$  is the household in the 55<sup>th</sup> percentile of food consumption expenditure; and

$N_{i_{45-55}}$  is the number of households in the 45<sup>th</sup> – 55<sup>th</sup> percentiles

### **Inequality Analysis**

Accurate income data is difficult to gather in low- and middle-income countries because most income sources are related to business, agriculture, and fishing. Household consumption and expenditure data are also difficult to collect in small-scale surveys because they require a special set questionnaire. A proxy measure of economic status is to summarize household wealth.<sup>7</sup> This can be directly measure from household available assets, income, consumption or expenditure. Due to the lack of income or expenditure data in Demographic and Health Survey and Multiple Indicator and Cluster Survey, an asset-based wealth index was derived from common and available data about assets, housing and access to services using principal component analysis. All Demographic and Health Survey and Multiple Indicator and Cluster Survey data provided wealth quintile variable based on this index. However, the household expenditure survey data used consumption expenditure to derive household economic status. The income score or expenditure data were divided into quintiles, with quintile 1 (Q1) indicating the poorest 20% of households and quintile 5 (Q5) representing the richest. We calculated one absolute indicator of inequality (the slope index of inequality),<sup>8,9</sup> and one relative inequality indicator (the ratio of the outcome in Q5 to Q1). The absolute and relative measures can produce different results that may lead to different conclusions; therefore,

both measures are important in order to give a clear picture of inequalities. We calculated the slope and relative index of inequality with regression models. The slope index uses the coverage values in the difference in percentage points between individuals at the top and bottom of the wealth scale. We calculated the slope and relative index of inequalities by regressing against an individual's/household's relative rank in the cumulative distribution of socioeconomic position.

## eReferences

1. Boerma J, Bryce J, Kinfu Y, Axelson H, Victora CG. Mind the gap: equity and trends in coverage of maternal, newborn, and child health services in 54 Countdown countries. *Lancet*. 2008;371(9620):1259-1267.
2. Xu K. *Distribution of health payments and catastrophic expenditures methodology*. Geneva: World Health Organization (WHO);2005.
3. Xu K, Evans DB, Kawabata K, Zeramini R, Klavus J, Murray CJ. Household catastrophic health expenditure: a multicountry analysis. *Lancet*. 2003;362(9378):111-117.
4. Barros AJ, Bertoldi AD. Out-of-pocket health expenditure in a population covered by the Family Health Program in Brazil. *International journal of epidemiology*. 2008;37(4):758-765.
5. Kim Y, Yang B. Relationship between catastrophic health expenditures and household incomes and expenditure patterns in South Korea. *Health Policy*. 2011;100(2-3):239-246.
6. Lara JLA, Gomez FR. Determining factors of catastrophic health spending in Bogota, Colombia. *Int J Health Care Fi*. 2011;11(2):83-100.
7. Fry K., Firestone R., Chakraborty N.M. Measuring Equity with Nationally Representative Wealth Quintiles. Washington, DC: PSI. 2014 (<http://www.psi.org/equity-wealth-quintileguide>).
8. Mackenbach JP, Kunst AE. Measuring the magnitude of socio-economic inequalities in health: an overview of available measures illustrated with two examples from Europe. *Soc Sci Med*. 1997;44(6):757-771.
9. World Health Organization. *Handbook on health inequality monitoring with a special focus on low-and middle-income countries*. World Health Organization; 2013.
10. World Bank. World Development Indicators. 2017. The World Bank . <http://databank.worldbank.org/data/reports.aspx?source=world-development-indicators> (accessed January 25, 2017).
